# Supplementary material
Source: publisher figshare collection journal article supplement (https://sage.figshare.com/ndownloader/files/21239988)
Supplement: Supplementary file 1 [file 21239988]

Archive with 1 entries (1 files):
- 21239988.out
